# Supplementary material for: Ultra-Porous Nanoparticle Networks: A Biomimetic Coating Morphology for Enhanced Cellular Response and Infiltration
Source: PubMed Central journal article supplement (PMC4830967; doi:10.1038/srep24305), 2016-04-14
Supplement: srep24305-s1.pdf [file srep24305-s1.pdf]

## Supplementary Information to

### **Ultra-Porous Nanoparticle Networks: A Biomimetic Coating Morphology for Enhanced Cellular Response and Infiltration**

*Noushin Nasiri<sup>1</sup>, Anthony Ceramidas<sup>1</sup>, Shayanti Mukherjee<sup>2</sup>, Anitha Panneerselvan<sup>2</sup>, David R. Nisbet<sup>2</sup> and Antonio Tricoli<sup>1\*</sup>*

<sup>1</sup>Nanotechnology Research Laboratory, Research School of Engineering, Australian National University, Canberra 2601, Australia

<sup>2</sup>Laboratory of Advanced Biomaterials, Research School of Engineering, Australian National University, Canberra 2601, Australia

\*Corresponding author: Antonio Tricoli, PhD

E-mail: antonio.tricoli@anu.edu.au

Tel: +61 2 6125 1696

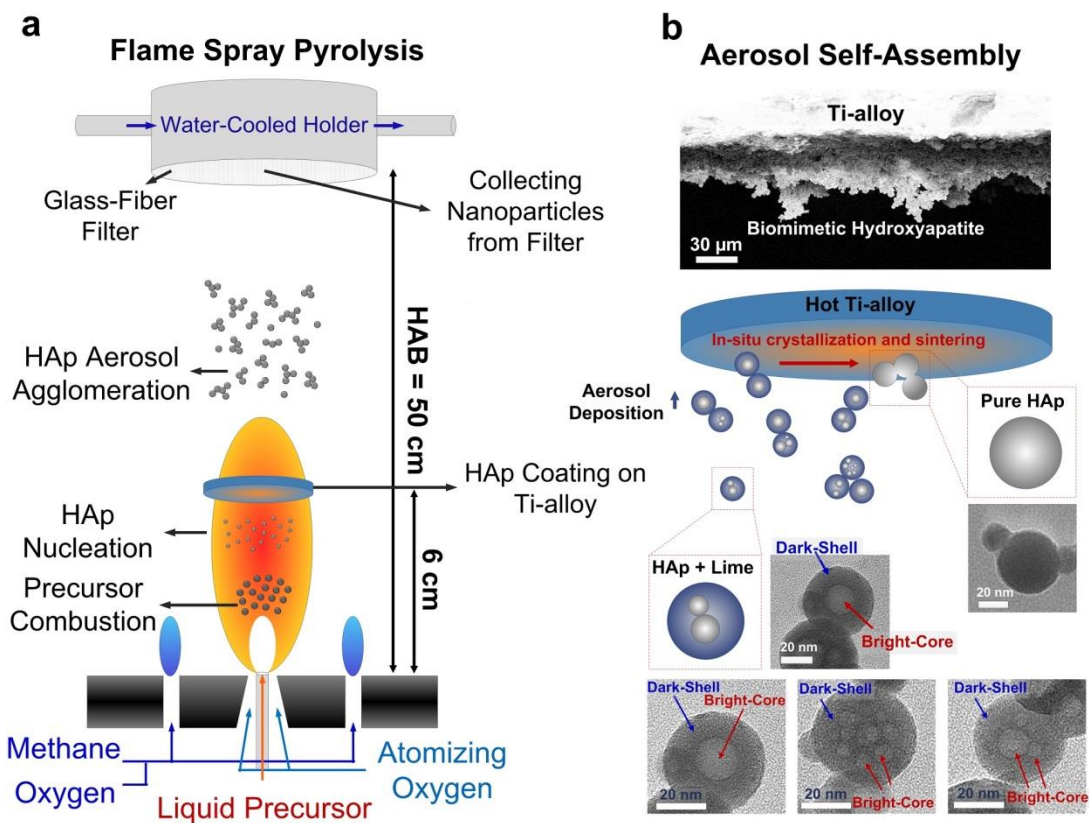

**Figure S1.** Schematics of (a) flame spray pyrolysis synthesis and (b) aerosol self-assembly of three dimensional ultra-porous films made of HAp nanoparticles at 6 cm height above the burner (HAB). The produced HAp nanoparticles have core-shell structure after nucleation while aerosol deposition on hot Ti-alloy leads to a pure HAp phase with no detectable trace of lime and other impurities.

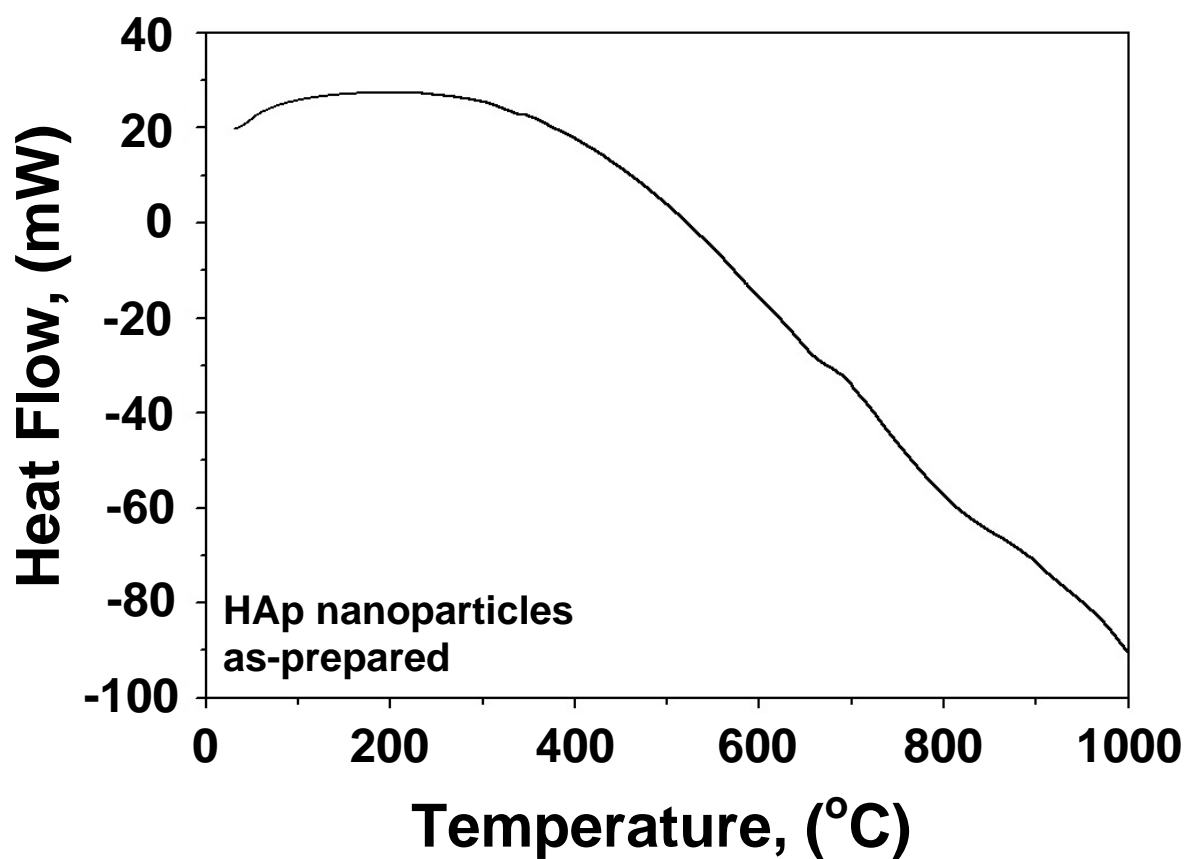

**Figure S2.** Differential scanning calorimetry (DSC) of the HAp nanoparticles collected from filter at an atomization pressure of 7 bar reveals no crystallization and decomposition up to 1000 °C.

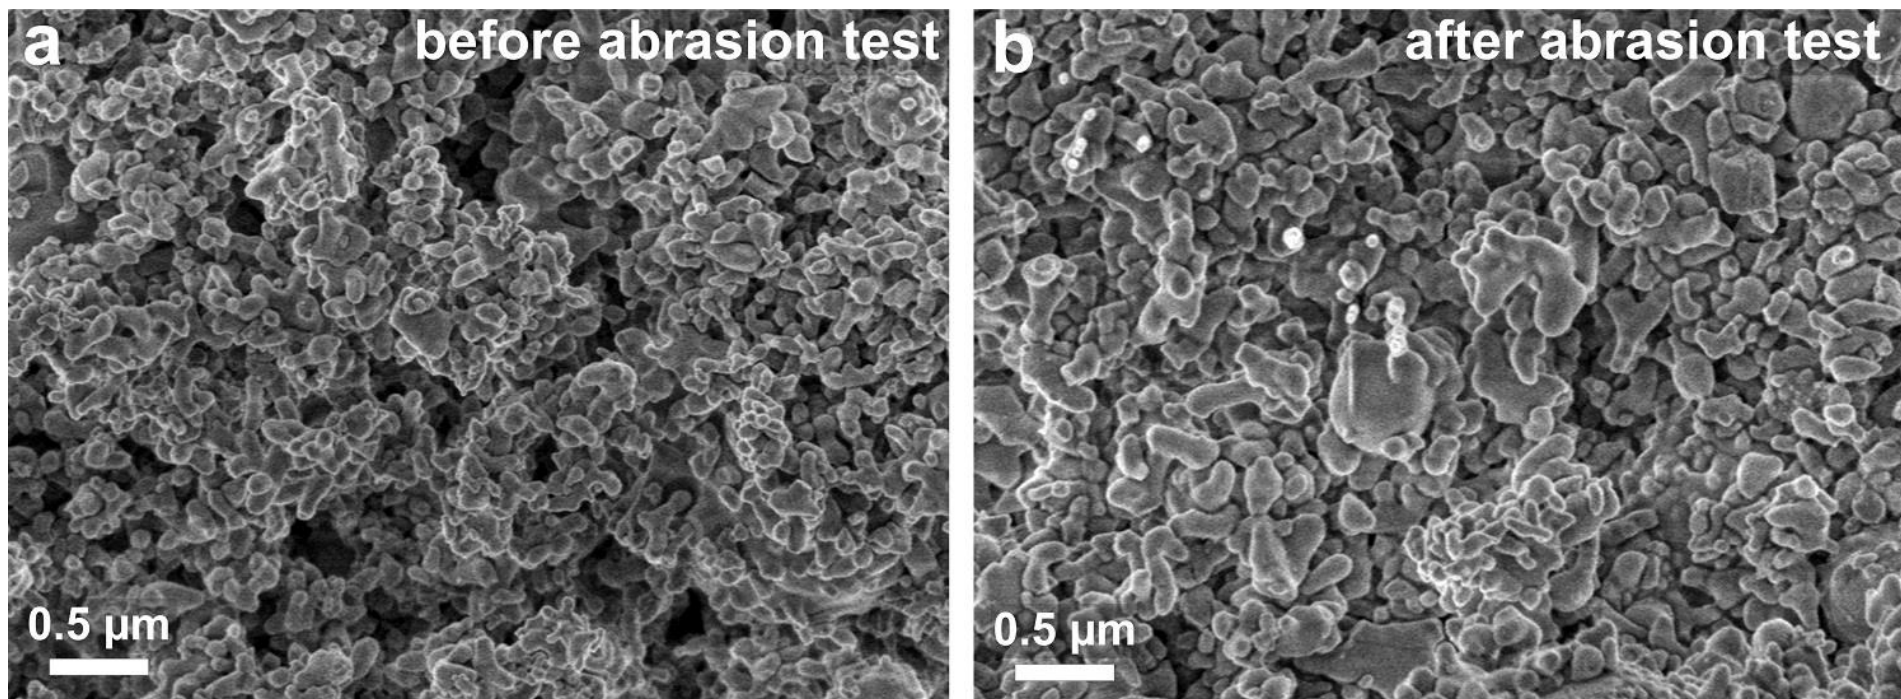

**Figure S3.** SEM micrographs of HAp UNN morphology (a) before and (b) after 10 cycles abrasion test showing minimal surface restructuring.

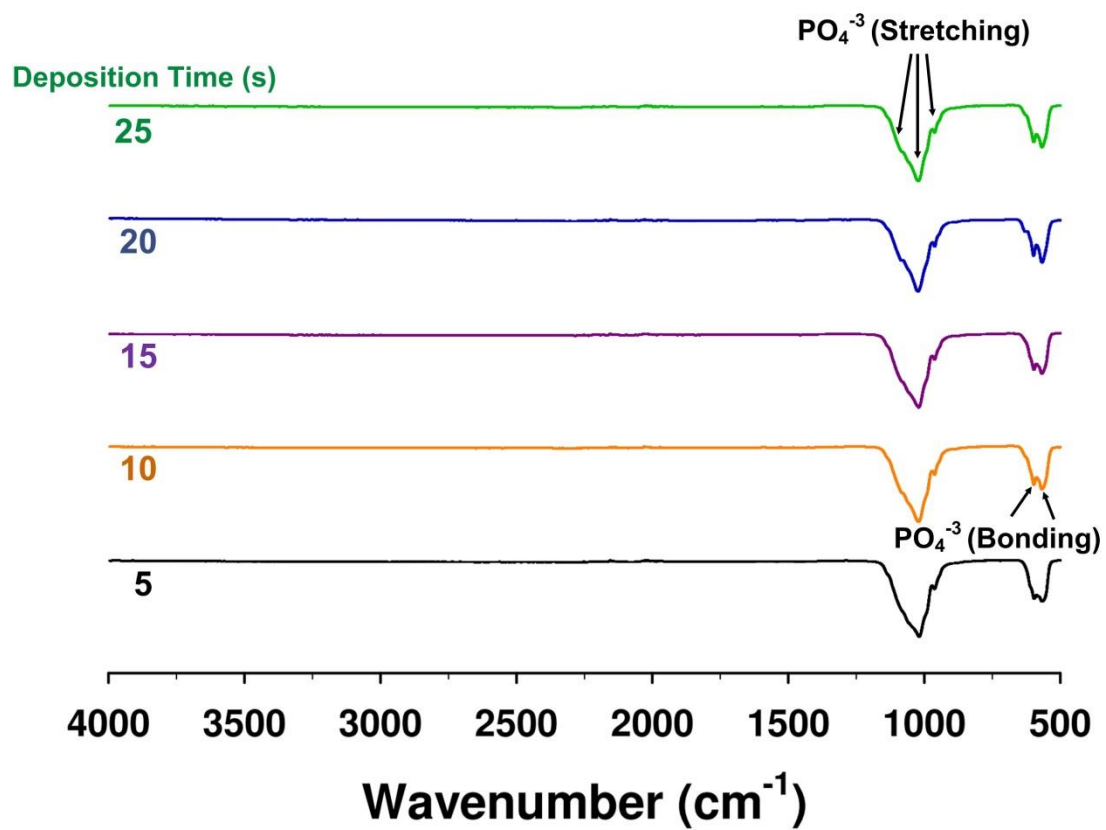

**Figure S4.** FTIR spectra of the HAp coatings as a function of the aerosol-deposition time.

### Ultra-Porous NPs Network

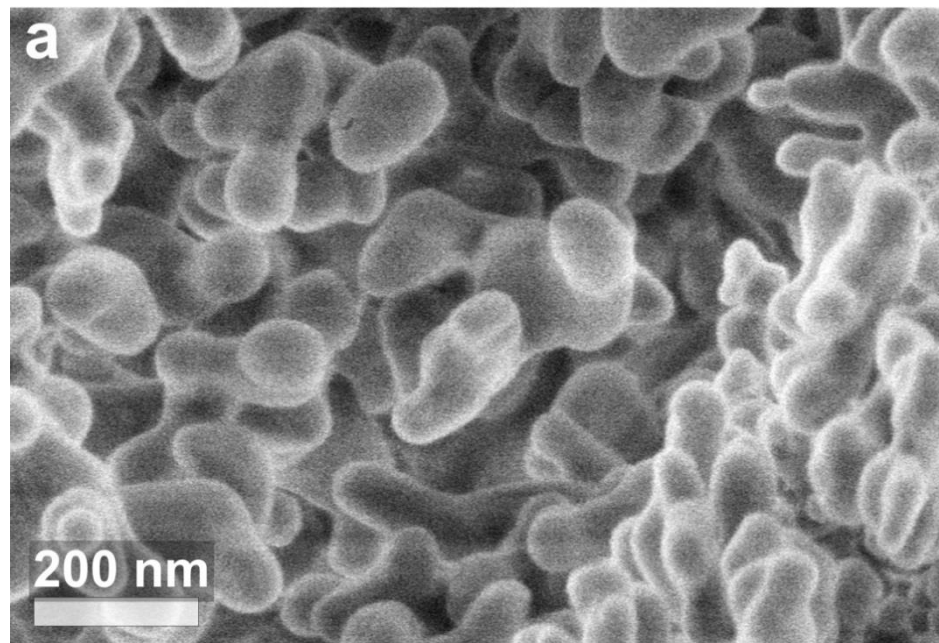

### Spin-Coated

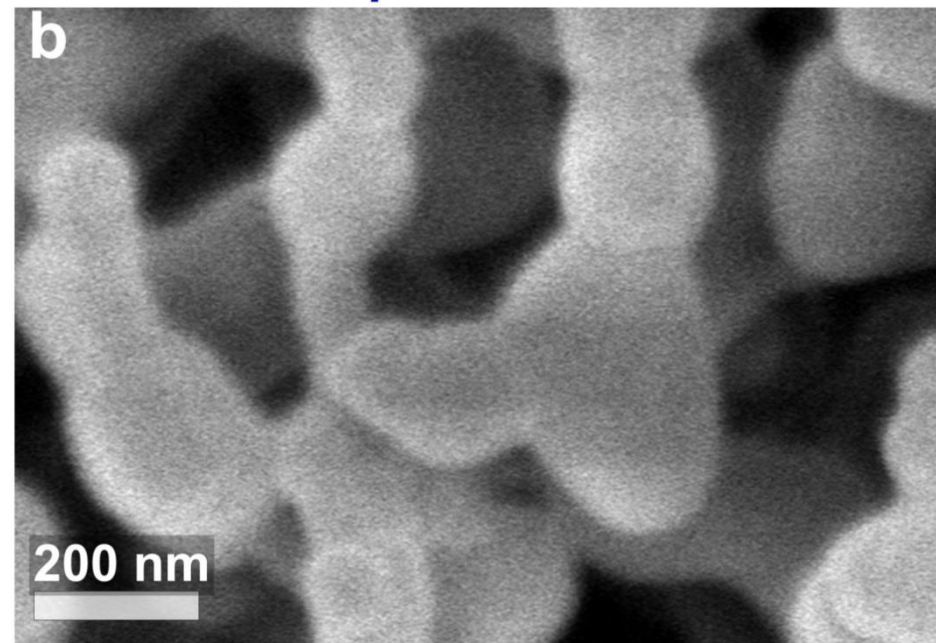

**Figure S5.** High magnification SEM images of (a) ultra-porous nanoparticles network made by flame spray pyrolysis compared to (b) spin-coated samples composed of the same flame-made particles.



## Ultra-Porous NPs Network

## Spin-Coated

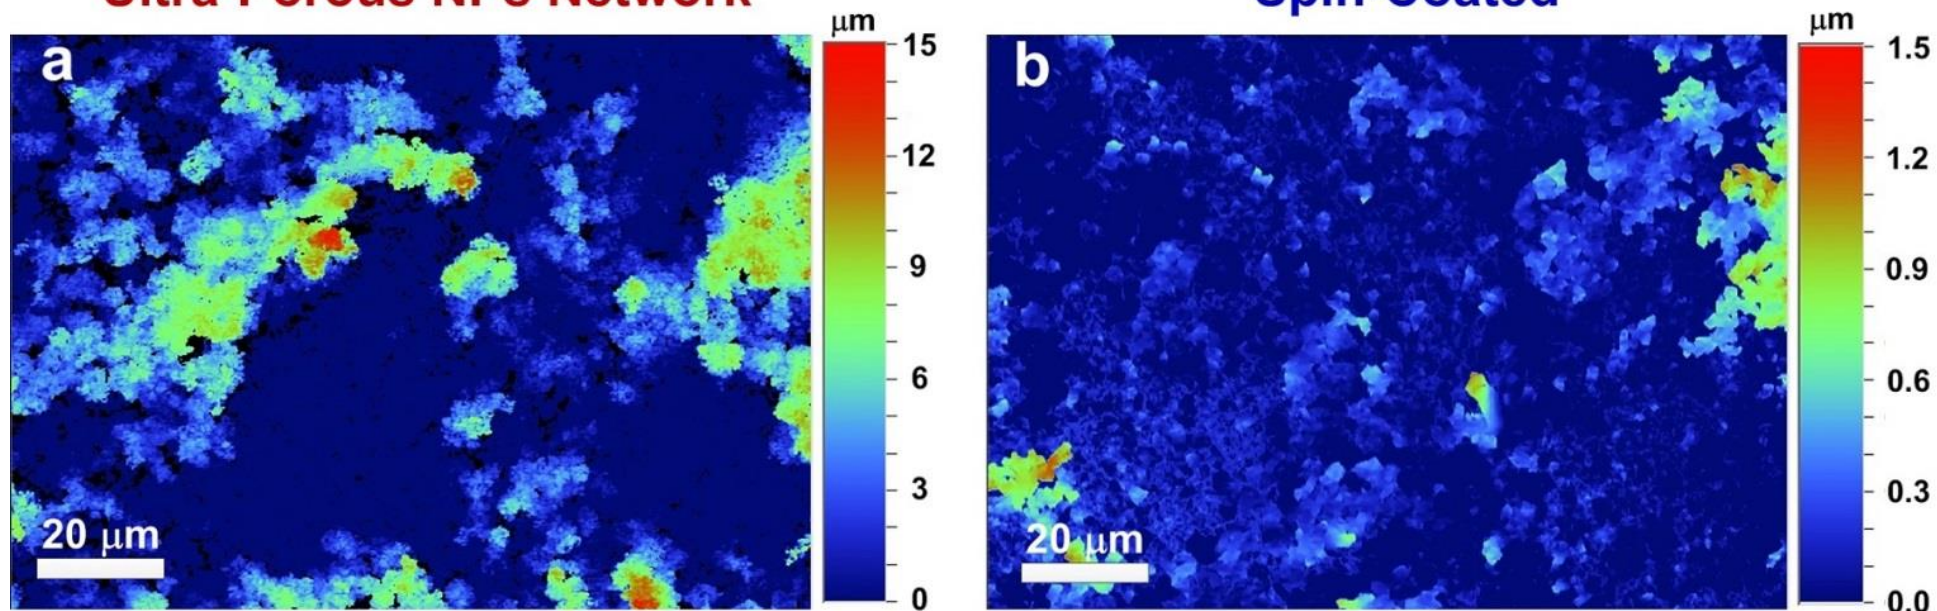

**Figure S6.** White Light Interferometry (WLI) micrographs of (a) ultra-porous HAp coating with 25 seconds deposition time compared to (b) spin-coated films.
